# Supplementary material for: Change in Age at Diagnosis of Oropharyngeal Cancer in the United States, 1975–2016
Source: PubMed Central journal article supplement (PMC7693134; doi:10.3390/cancers12113191), 2020-10-30
Supplement: cancers-12-03191-s001.pdf [file cancers-12-03191-s001.pdf]

Article

# Change in age at diagnosis of oropharyngeal cancer in the United States, 1975-2016

Brittany J Cline,<sup>\*</sup> Matthew C Simpson, Matthew Gropler, Aleksandr R Bukatko, Eric Adjei Boakye, Kahee A Mohammed and Nosayaba Osazuwa-Peters

## Supplementary Information

**Table S1.** Annual percentage changes and average annual percentage changes average age at diagnosis from 1975–2016 by head and neck anatomic subsites.

| Characteristics | <i>n</i> (%) | Mean Age at Diagnosis (SD) | <i>p</i> -value | Year range                          | APC (95% CI)                                                    | Average APC from 1975–2016 (95% CI) |
|-----------------|--------------|----------------------------|-----------------|-------------------------------------|-----------------------------------------------------------------|-------------------------------------|
| Site            |              |                            | < 0.01          |                                     |                                                                 |                                     |
| Hypopharynx     | 7044 (5.9)   | 63.2 (10.4)                |                 | 1975–2016                           | 0.01 (−0.03, 0.05)                                              | 0.01 (−0.03, 0.05)                  |
| Larynx          | 33768 (28.4) | 63.2 (10.9)                |                 | 1975–1985<br>1985–2016              | 0.36 (0.21, 0.52)<br>0.04 (0.01, 0.07)                          | 0.12 (0.08, 0.16)                   |
| Nasopharynx     | 4163 (3.5)   | 54.4 (15.1)                |                 | 1975–2016                           | 0.07 (0.00, 0.15)                                               | 0.07 (0.00, 0.15)                   |
| Oral Cavity     | 39178 (33.0) | 64.1 (13.8)                |                 | 1975–2016                           | 0.05 (0.03, 0.06)                                               | 0.05 (0.03, 0.06)                   |
| Oropharynx      | 31702 (26.7) | 60.3 (10.8)                |                 | 1975–1996<br>1996–2002<br>2002–2016 | 0.00 (−0.06, 0.07)<br>−0.88 (−1.43, −0.32)<br>0.37 (0.28, 0.45) | 0.00 (−0.09, 0.09)                  |
| Sinonasal       | 2955 (2.5)   | 64.4 (13.5)                |                 | 1975–1991<br>1991–2016              | 0.36 (0.06, 0.67)<br>−0.18 (−0.33, −0.02)                       | 0.03 (−0.11, 0.18)                  |

Note: API/AIAN = Asian/Pacific Islander/American Indian/Alaska Native; APC = Annual Percentage Change.

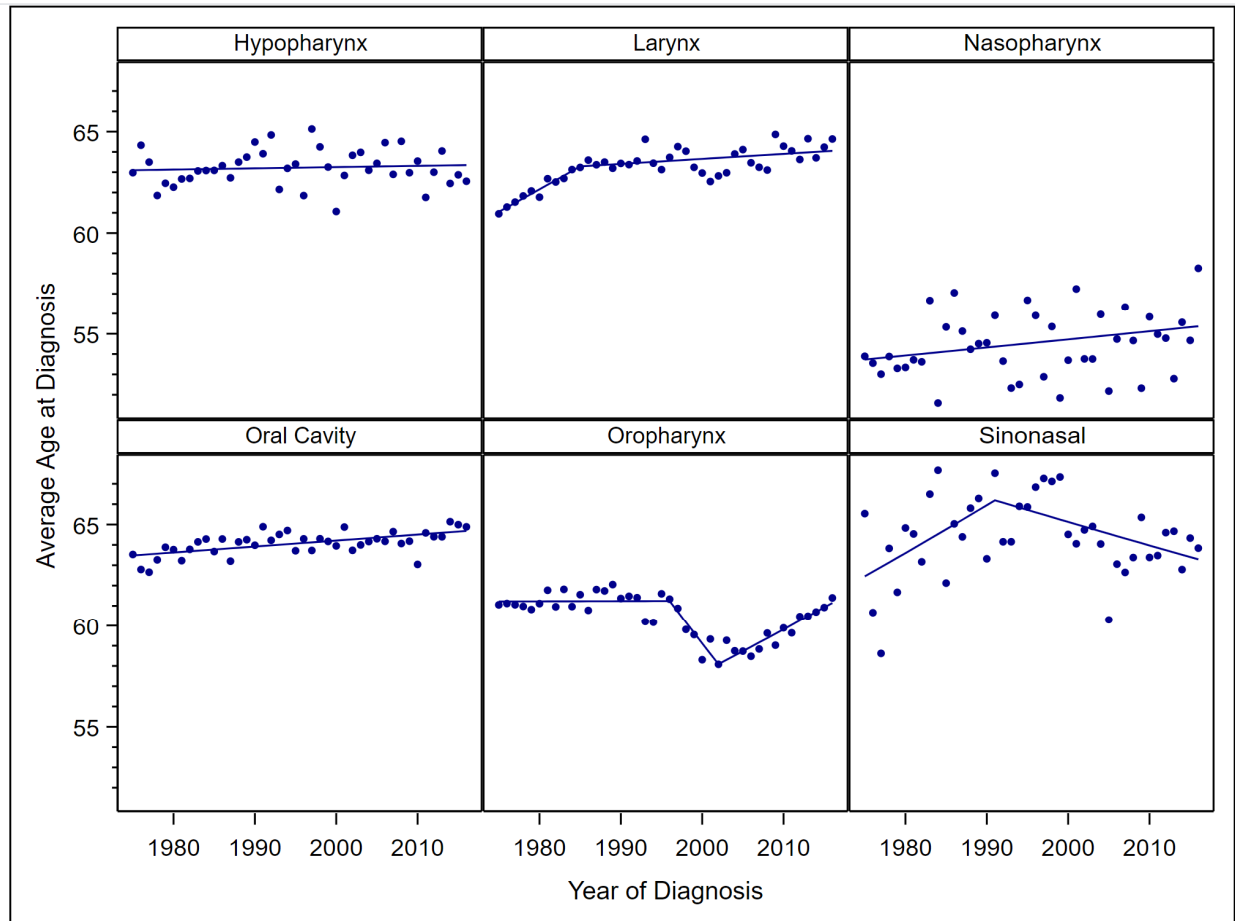

**Figure S1.** Observed average age at diagnosis by year and Joinpoint regression models by head and neck anatomic subsite.

**Publisher’s Note:** MDPI stays neutral with regard to jurisdictional claims in published maps and institutional affiliations.

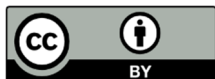

© 2020 by the authors. Licensee MDPI, Basel, Switzerland. This article is an open access article distributed under the terms and conditions of the Creative Commons Attribution (CC BY) license (<http://creativecommons.org/licenses/by/4.0/>).
